# Supplementary material for: Functionalised carbazole as a cathode for high voltage non-aqueous organic redox flow batteries
Source: Royal Society of Chemistry journal article supplement (doi:10.1039/d0nj02543g), 2020-01-01
Supplement: d0nj02543g1.pdf [file d0nj02543g1.pdf]

**Supporting information**

**Functionalised carbazole as cathode for high voltage non-aqueous  
organic redox flow battery**

Chinmaya R. Mirle, Raja M, Vasudevarao P, Sankararaman S\* and Kothandaraman R\*

*Department of Chemistry, Indian Institute of Technology Madras, Chennai, India*

\*Corresponding author's E-mail: [sanka@iitm.ac.in](mailto:sanka@iitm.ac.in) and [rkraman@iitm.ac.in](mailto:rkraman@iitm.ac.in)

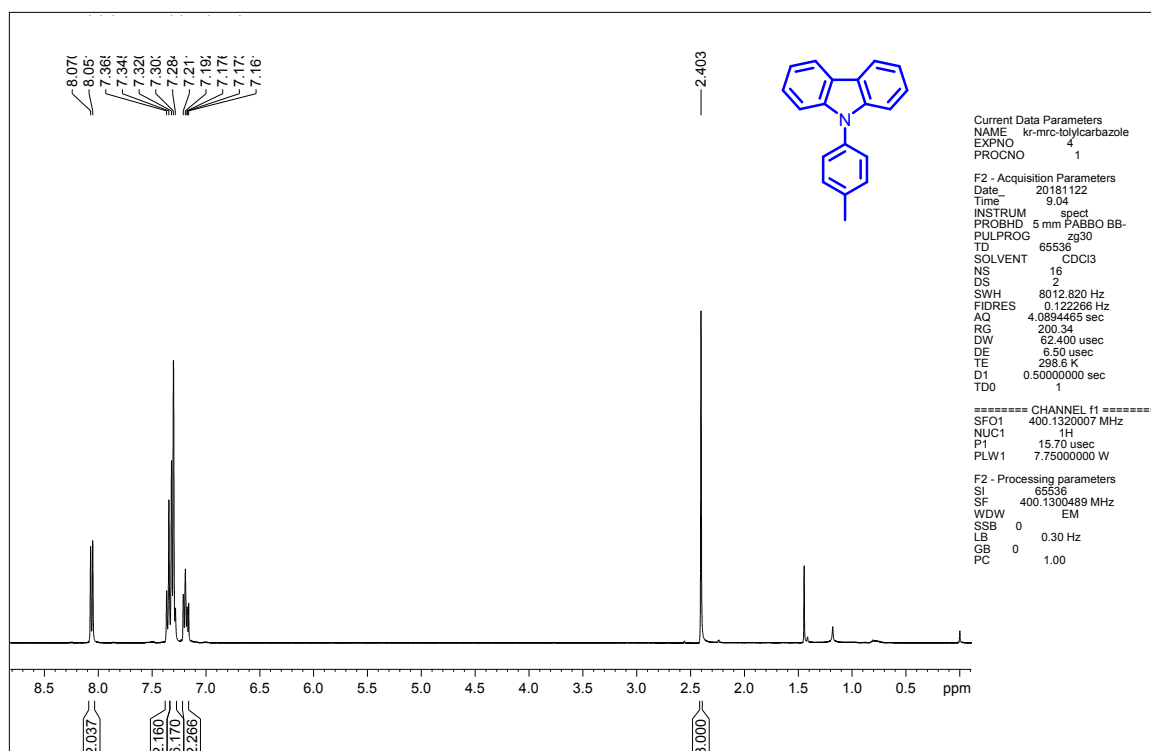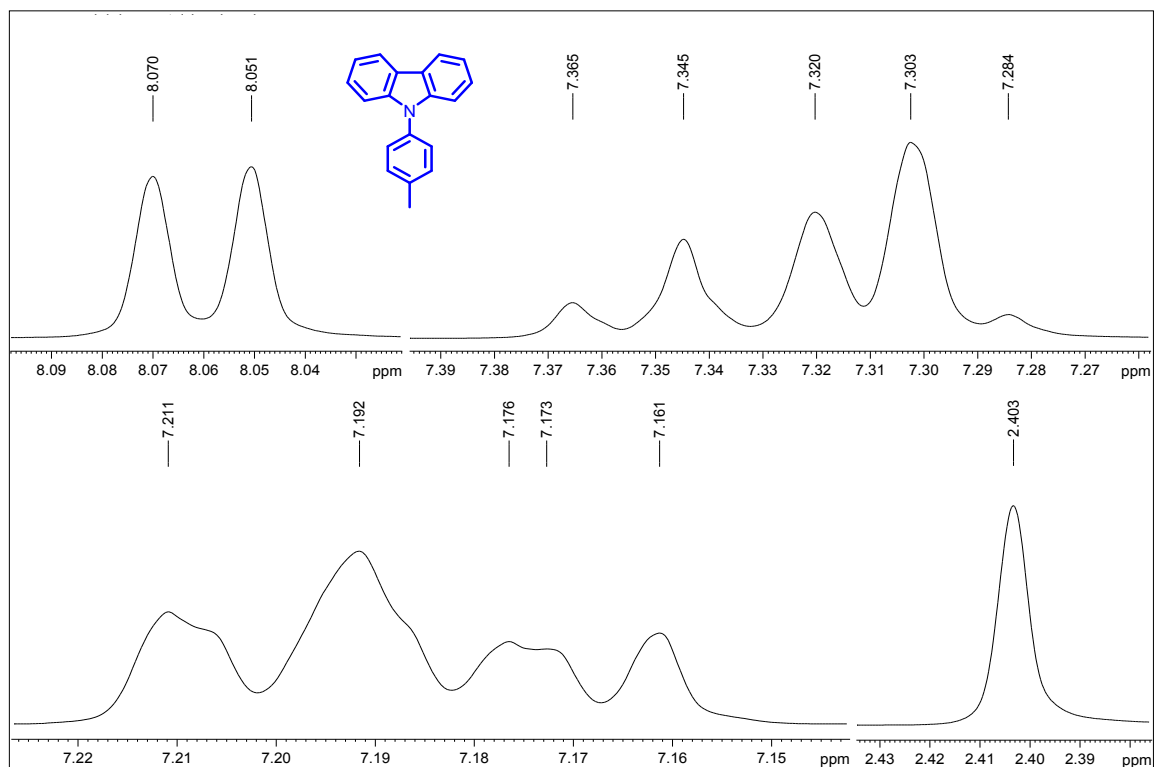

**Fig. S1 (a) and (b)**  $^1\text{H}$  NMR spectrum of (2) in  $\text{CDCl}_3$  (400 MHz)

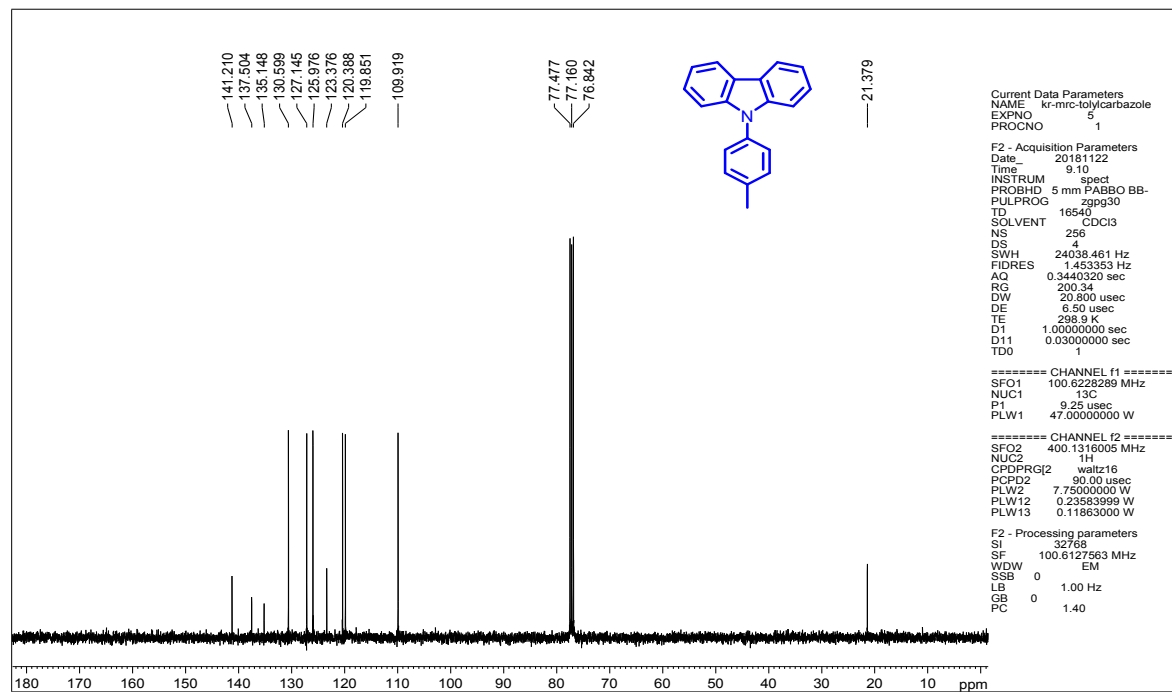

**Fig. S2**  $^{13}\text{C}$  spectrum of (2) in  $\text{CDCl}_3$  (100 MHz)

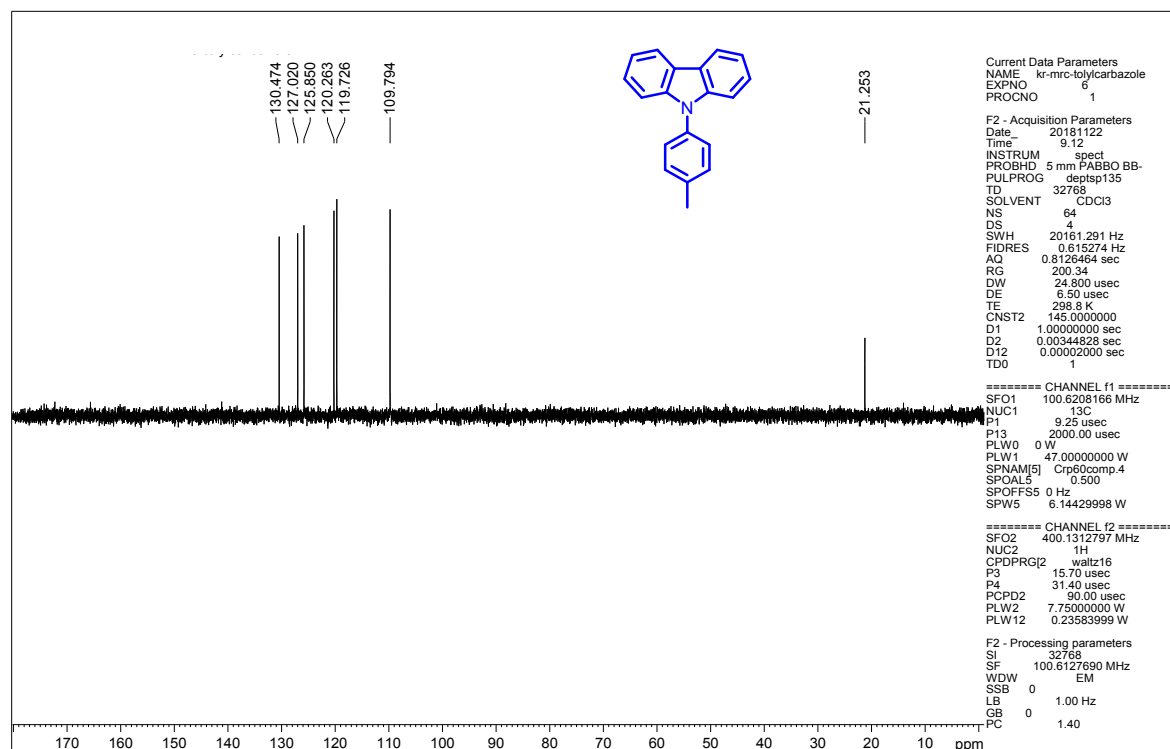

Fig. S3 DEPT of (2) in CDCl<sub>3</sub> (100 MHz)

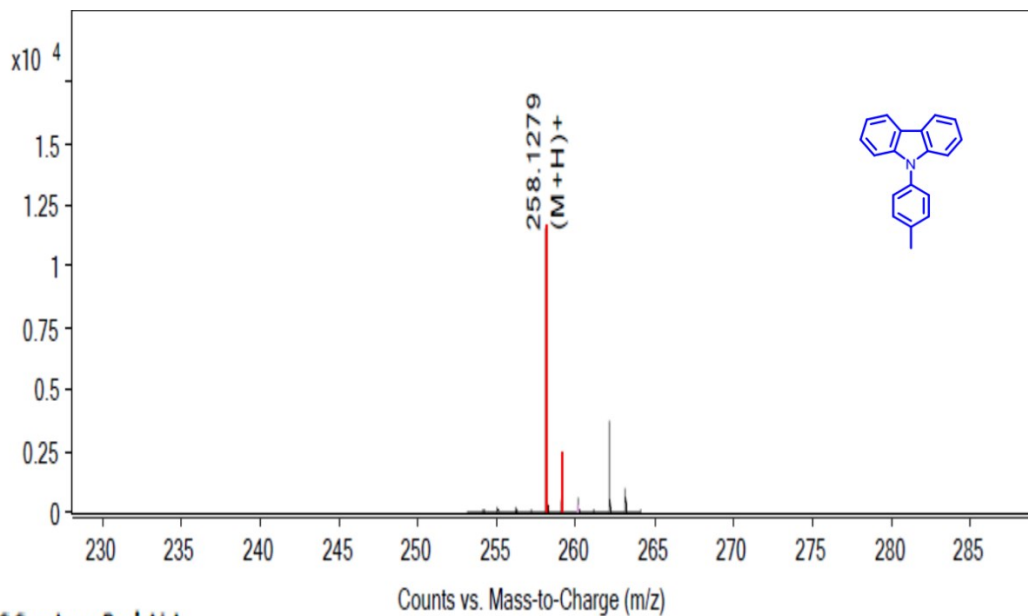

MS Spectrum Peak List

| m/z      | Calc m/z | Diff(ppm) | z | Abund    | Ion    |
|----------|----------|-----------|---|----------|--------|
| 258.1279 | 258.1277 | -0.61     | 1 | 11610.2  | (M+H)+ |
| 258.1279 |          |           |   | 11608.09 |        |
| 259.1306 | 259.131  | 1.39      | 1 | 2245.81  | (M+H)+ |

--- End Of Report ---

Fig. S4 HRMS of (2)

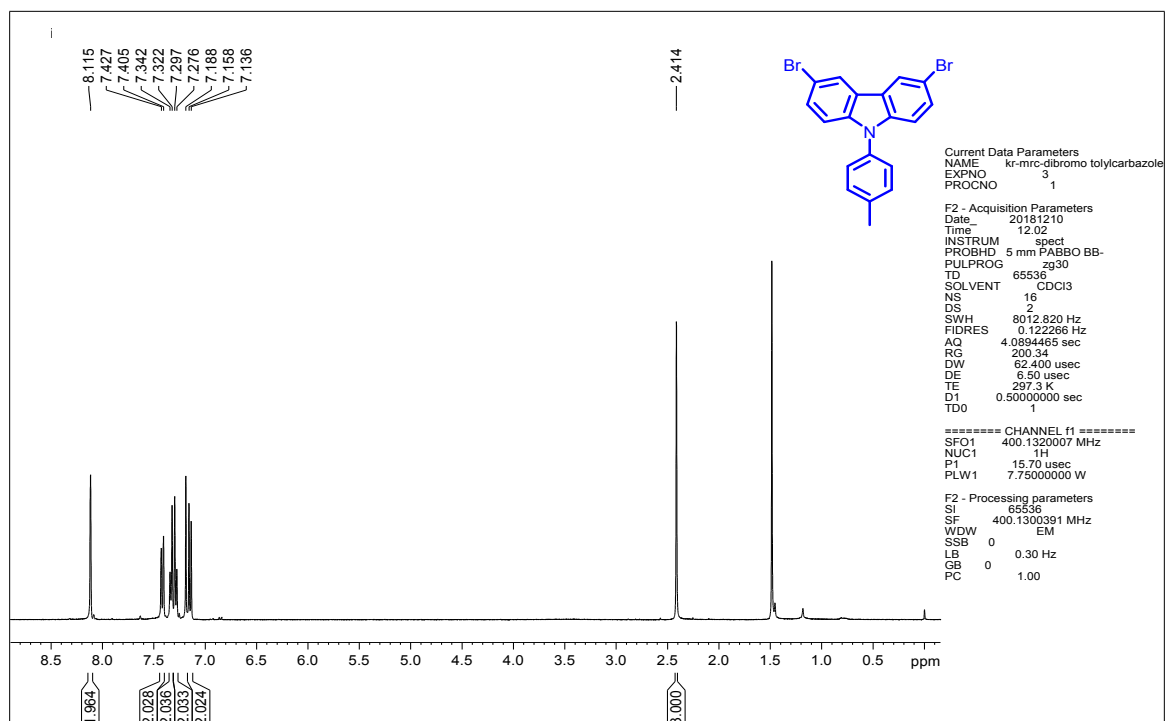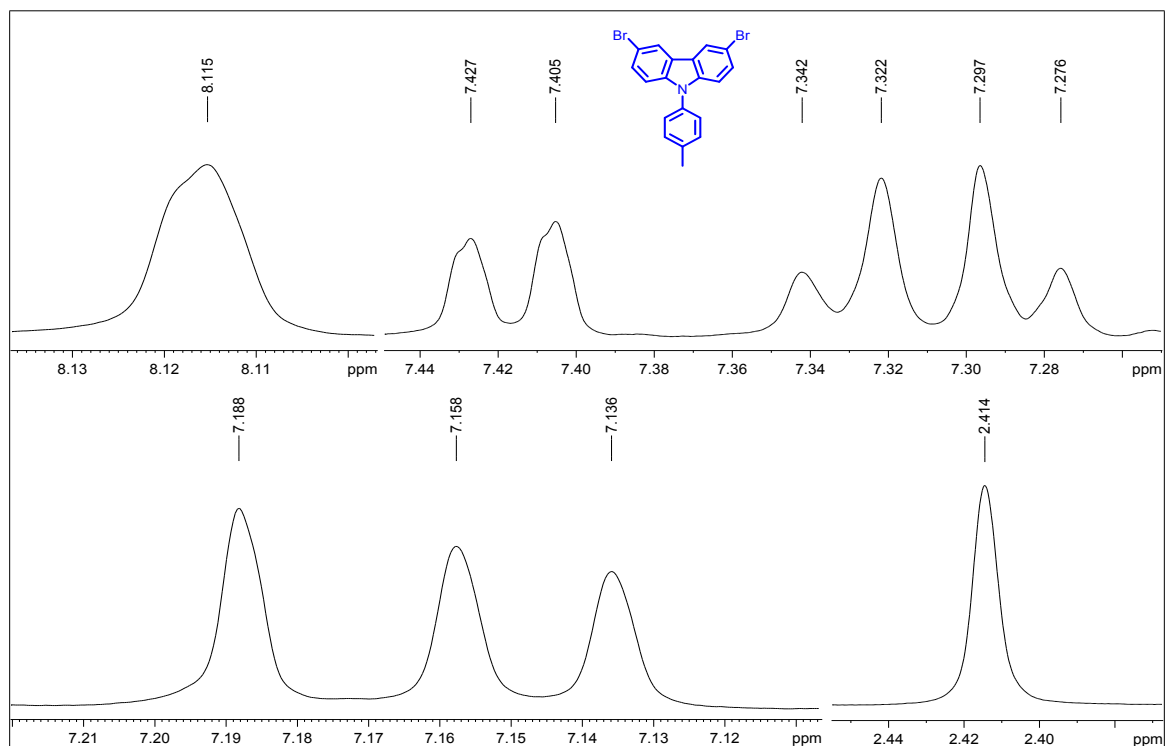

**Fig. S5 (a) and (b)**  $^1\text{H}$  NMR spectrum of (3) in  $\text{CDCl}_3$  (400 MHz)

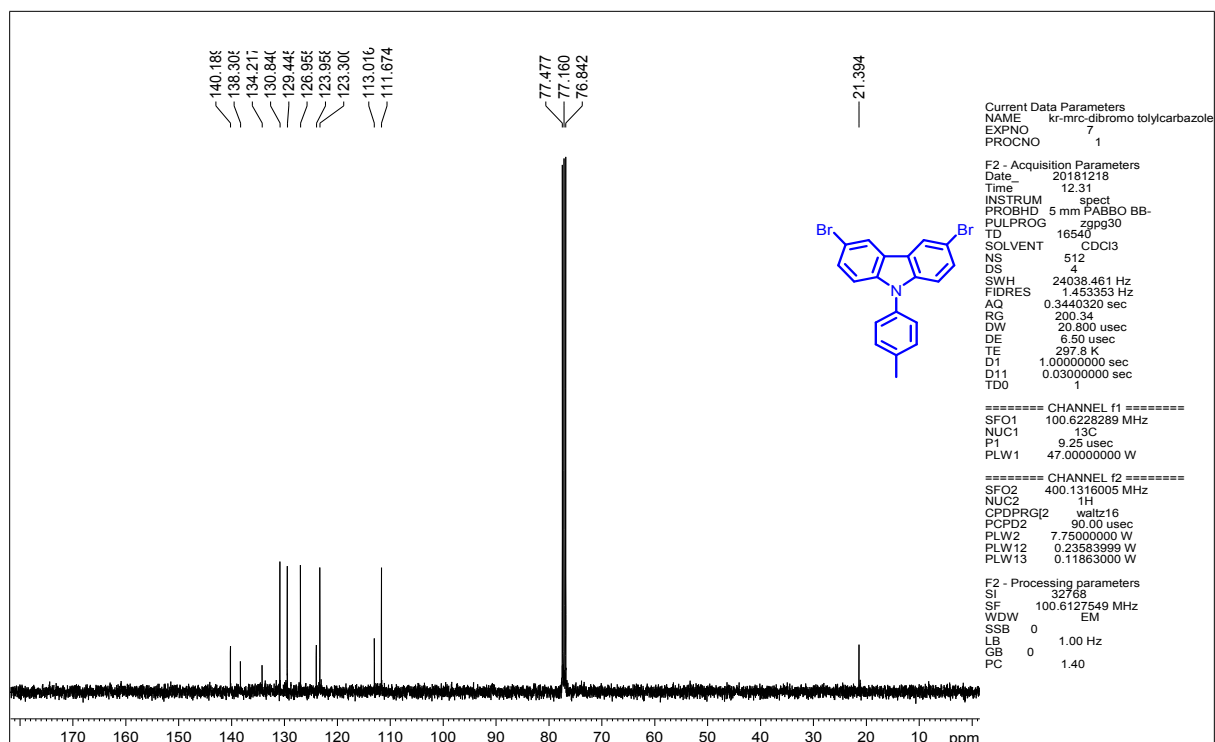

Fig. S6  $^{13}\text{C}$  spectrum of (3) in  $\text{CDCl}_3$  (100 MHz)

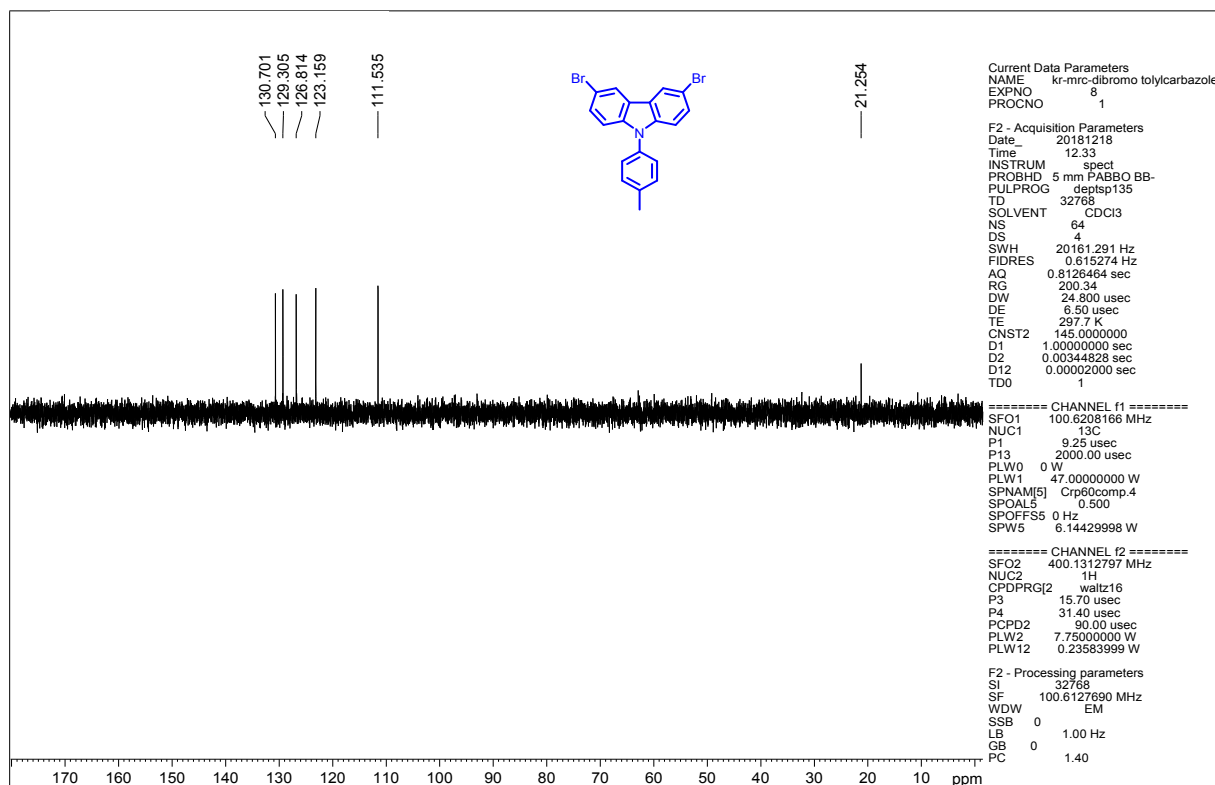

Fig. S7 DEPT of (3) in  $\text{CDCl}_3$  (100 MHz)

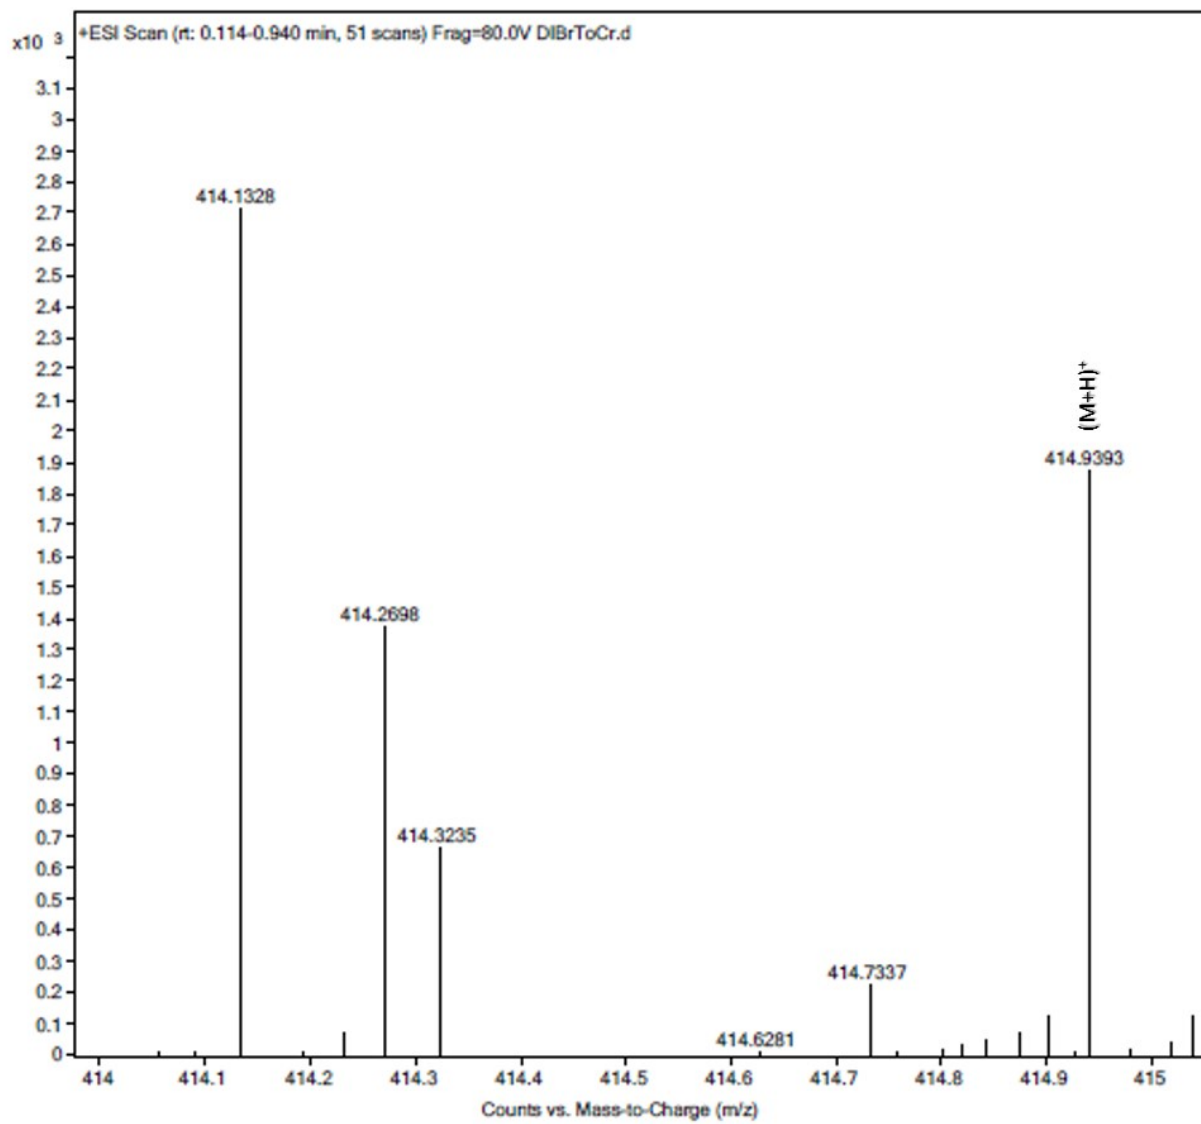

Fig. S8 HRMS of (3)

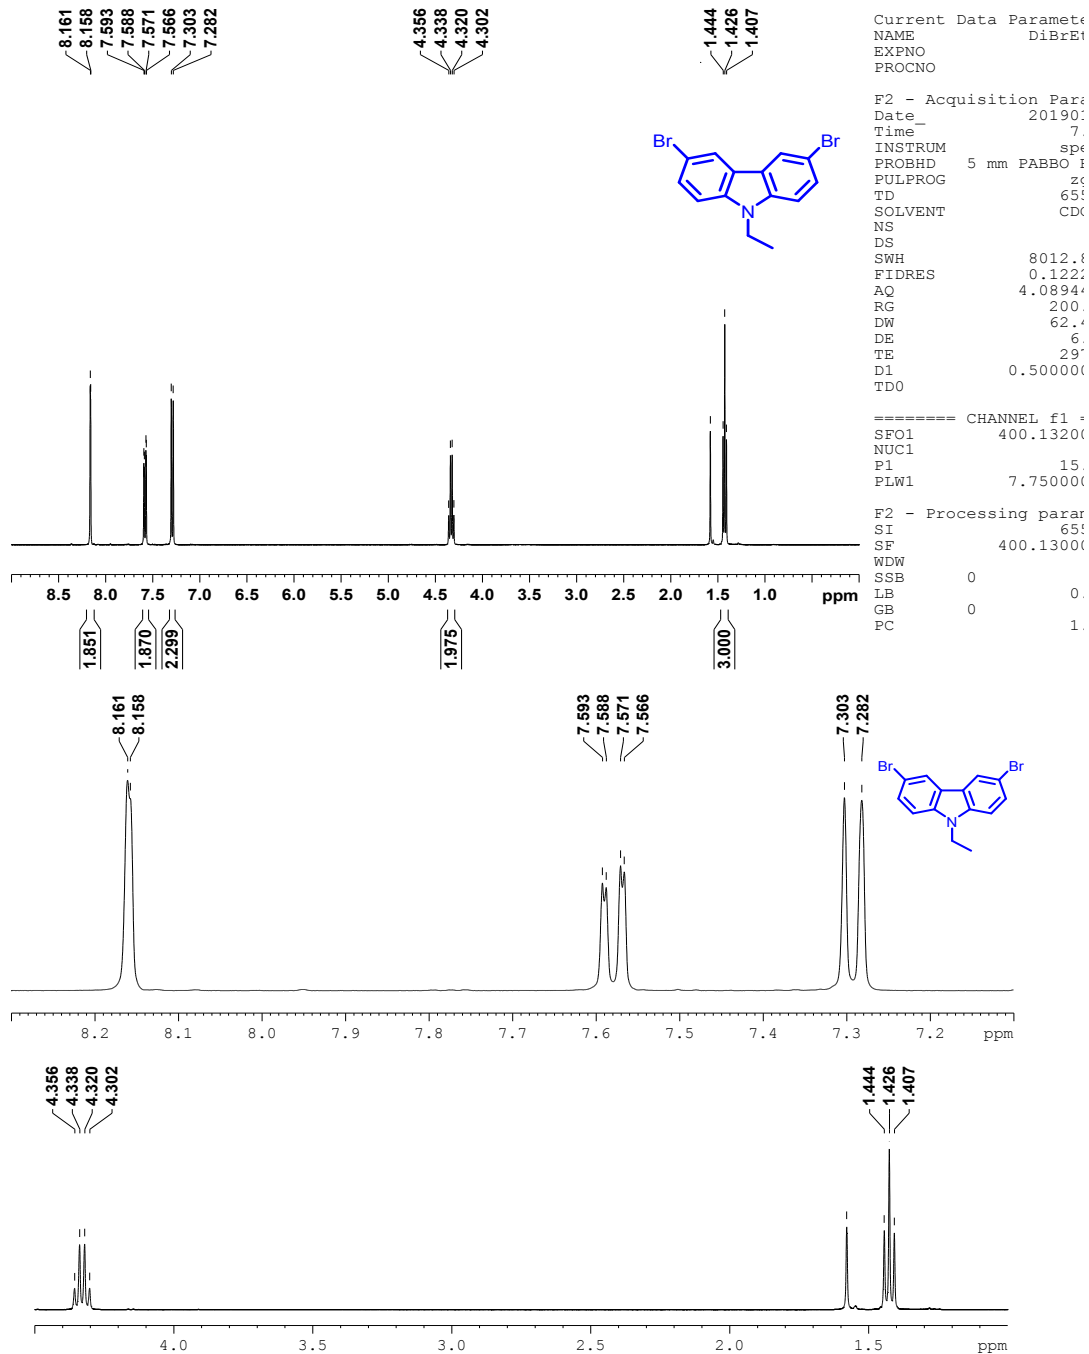

Fig. S9 (a) and (b)  $^1\text{H}$  NMR spectrum of (4)  $\text{CDCl}_3$  (400 MHz)



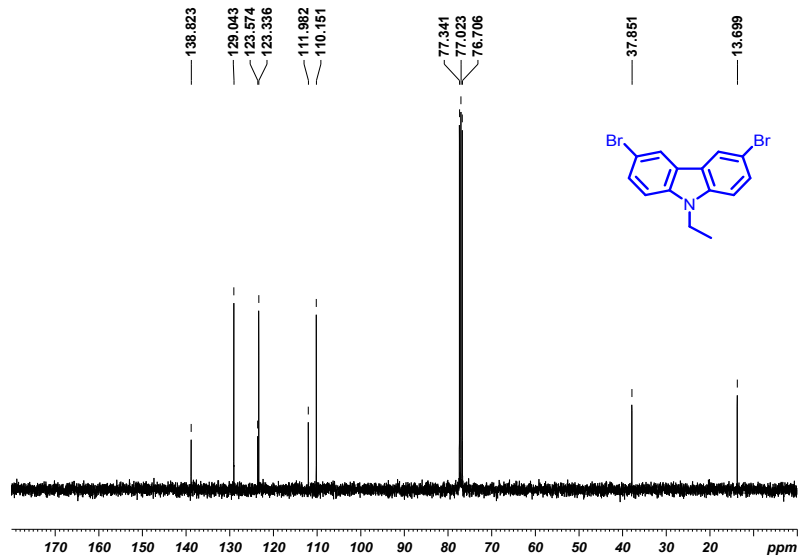

Current Data Parameters  
 NAME DiBrEtCr  
 EXPNO 2  
 PROCNO 1

F2 - Acquisition Parameters  
 Date\_ 20190116  
 Time 7.18  
 INSTRUM spect  
 PROBHD 5 mm PABBO BB-  
 PULPROG zgpg30  
 TD 16540  
 SOLVENT CDCl3  
 NS 256  
 DS 4  
 SWH 24038.461 Hz  
 FIDRES 1.453353 Hz  
 AQ 0.3440320 sec  
 RG 200.34  
 DW 20.800 usec  
 DE 6.50 usec  
 TE 298.2 K  
 D1 1.00000000 sec  
 D11 0.03000000 sec  
 TDO 1

===== CHANNEL f1 =====  
 SFO1 100.6228289 MHz  
 NUC1 13C  
 P1 9.25 usec  
 PLW1 47.00000000 W

===== CHANNEL f2 =====  
 SFO2 400.1316005 MHz  
 NUC2 1H  
 CPDPRG2 waltz16  
 PCPD2 90.00 usec  
 PLW2 7.75000000 W  
 PLW12 0.23583999 W  
 PLW13 0.11863000 W

F2 - Processing parameters  
 SI 32768  
 SF 100.6127690 MHz  
 WDW EM  
 SSB 0

Fig. S10 <sup>13</sup>C NMR spectrum of (4) in CDCl<sub>3</sub> (100 MHz)

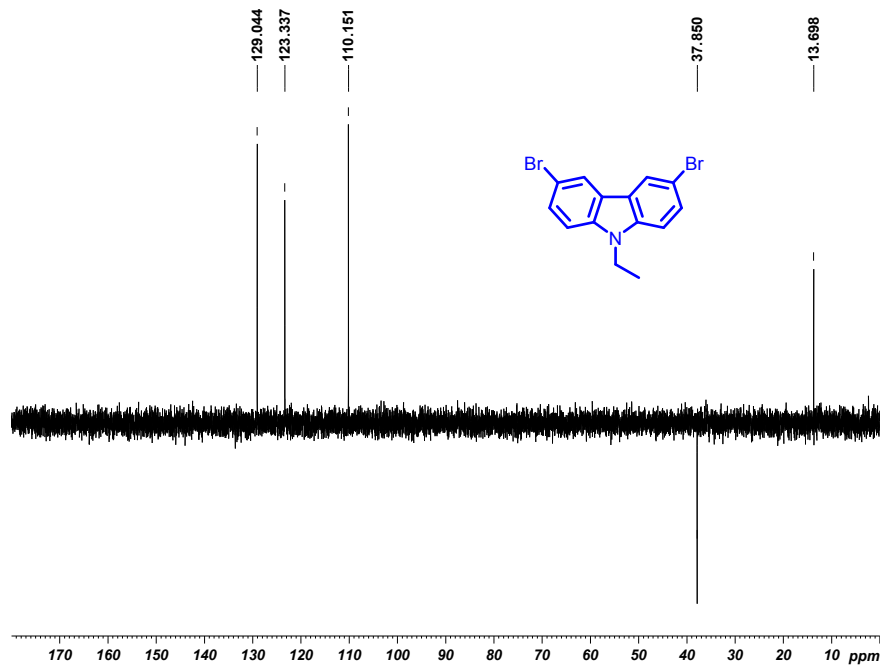

Current Data Parameters  
 NAME DiBrEtCr  
 EXPNO 3  
 PROCNO 1

F2 - Acquisition Parameters  
 Date\_ 20190116  
 Time 7.20  
 INSTRUM spect  
 PROBHD 5 mm PABBO BB-  
 PULPROG deptsp135  
 TD 32768  
 SOLVENT CDCl3  
 NS 64  
 DS 4  
 SWH 20161.291 Hz  
 FIDRES 0.615274 Hz  
 AQ 0.8126464 sec  
 RG 200.34  
 DW 24.800 usec  
 DE 6.50 usec  
 TE 298.1 K  
 CNST2 145.0000000  
 D1 1.00000000 sec  
 D2 0.00344828 sec  
 D12 0.00002000 sec  
 TDO 1

===== CHANNEL f1 =====  
 SFO1 100.6208166 MHz  
 NUC1 13C  
 P1 9.25 usec  
 P13 2000.00 usec  
 PLW0 0 W  
 PLW1 47.00000000 W  
 SPNAM[5] Crp60comp.4  
 SPOAL5 0.500  
 SPOFFS5 0 Hz  
 SPW5 6.14429998 W

===== CHANNEL f2 =====  
 SFO2 400.1312797 MHz  
 NUC2 1H  
 CPDPRG2 waltz16  
 P3 15.70 usec  
 P4 31.40 usec  
 PCPD2 90.00 usec  
 PLW2 7.75000000 W  
 PLW12 0.23583999 W

Fig. S11 DEPT of (4) in CDCl<sub>3</sub> (100 MHz)

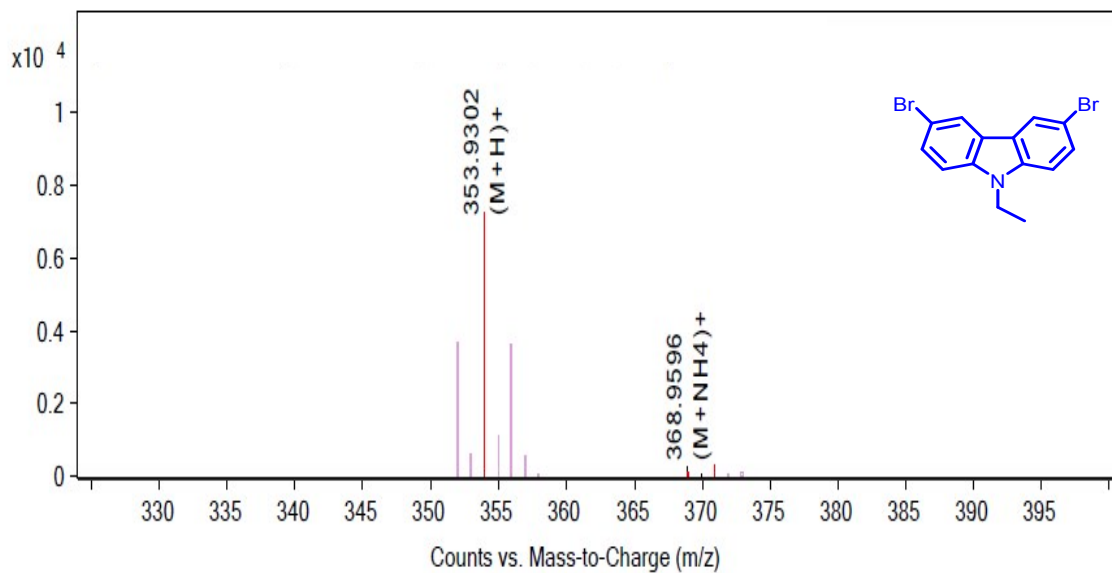

MS Spectrum Peak List

| m/z      | z | Abund   | Ion                               |
|----------|---|---------|-----------------------------------|
| 353.9302 | 1 | 7250.48 | (M+H) <sup>+</sup>                |
| 368.9596 | 1 | 246.42  | (M+NH <sub>4</sub> ) <sup>+</sup> |
| 369.9629 | 1 | 91.86   | (M+NH <sub>4</sub> ) <sup>+</sup> |
| 370.9572 | 1 | 100.03  | (M+NH <sub>4</sub> ) <sup>+</sup> |

Fig. S12 HRMS of (4)

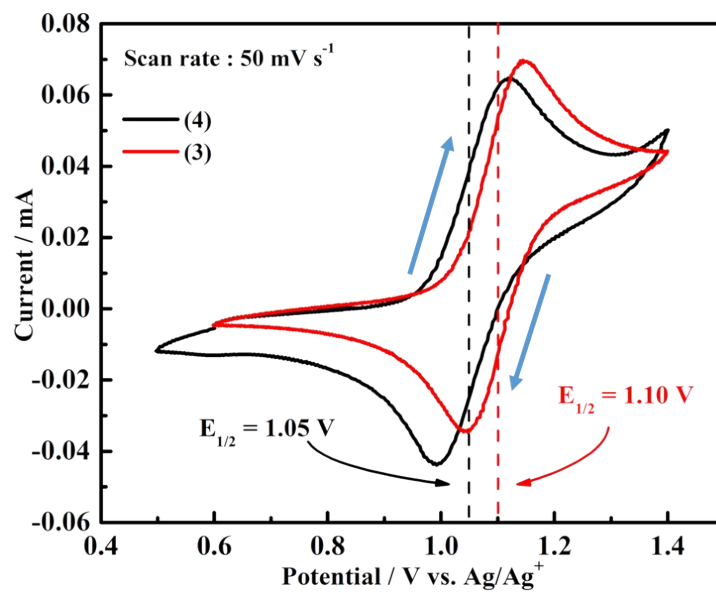

Fig. S13 compares E<sub>1/2</sub> values for the CV of (4) and (3) in 4 : 1 Solvent mixture of ACN : DCM containing 0.1 M TBAPF<sub>6</sub> as supporting electrolyte.
